# Supplementary material for: Scoping Review of Available Culinary Nutrition Interventions for People with Neurological Conditions
Source: MDPI journal article supplement (doi:10.3390/nu16030462), 2024-02-05
Supplement: s1 [file s1]

## Supplementary Material

Supplementary Table S1: Search Strategies

| No. | Search Terms (MEDLINE)                                                                                                                                                                             | Results (n = 2,116) |
|-----|----------------------------------------------------------------------------------------------------------------------------------------------------------------------------------------------------|---------------------|
| 1   | Nervous System Disease/ or neurological condition.mp.                                                                                                                                              | 50,112              |
| 2   | stroke.mp. or Stroke/                                                                                                                                                                              | 366,306             |
| 3   | Brain Injuries/ or brain injur*.mp.                                                                                                                                                                | 110,724             |
| 4   | multiple sclerosis.mp. or Multiple Sclerosis/                                                                                                                                                      | 98,311              |
| 5   | Parkinson Disease.mp. or Parkinson Disease/                                                                                                                                                        | 90,151              |
| 6   | Alzheimer Disease.mp. or Alzheimer Disease/                                                                                                                                                        | 124,070             |
| 7   | culinary.mp.                                                                                                                                                                                       | 2,604               |
| 8   | Cooking/ or cook*.ti,ab.                                                                                                                                                                           | 44,173              |
| 9   | Meals/ or meal.ti,ab.                                                                                                                                                                              | 63,156              |
| 10  | Food/ or food.ti,ab.                                                                                                                                                                               | 548,362             |
| 11  | nutrition.mp.                                                                                                                                                                                      | 276,241             |
| 12  | program.ti,ab.                                                                                                                                                                                     | 523,303             |
| 13  | Education/ or education.ti,ab.                                                                                                                                                                     | 570,320             |
| 14  | Diet Therapy/ or diet* therap*.ti,ab.                                                                                                                                                              | 15,046              |
| 15  | intervention.ti,ab.                                                                                                                                                                                | 774,474             |
| 16  | train*.ti,ab.                                                                                                                                                                                      | 701,707             |
| 17  | Rehabilitation/ or rehabilitation.ti,ab.                                                                                                                                                           | 199,334             |
| 18  | 1 or 2 or 3 or 4 or 5 or 6                                                                                                                                                                         | 806,976             |
| 19  | 7 or 8 or 9 or 10 or 11                                                                                                                                                                            | 848,896             |
| 20  | 12 or 13 or 14 or 15 or 16 or 17                                                                                                                                                                   | 2,334,373           |
| 21  | 18 and 19 and 20                                                                                                                                                                                   | 2,116               |
| No. | Search Terms (CINAHL)                                                                                                                                                                              | Results (n = 43)    |
| 1   | (MH "Nervous System Diseases+") OR (MH "Neurodegenerative Diseases+") OR (MH "Autoimmune Diseases of the Nervous System+") OR (MH "Autonomix Nervous System Diseases+") OR neurological conditions | 859,622             |
| 2   | (MH "Stroke+") OR stroke                                                                                                                                                                           | 144,282             |
| 3   | (MH "Brain Injuries+") OR brain injur*                                                                                                                                                             | 44,880              |
| 4   | (MH "Multiple Sclerosis") OR multiple sclerosis                                                                                                                                                    | 26,744              |
| 5   | (MH "Parkinson Disease+") OR parkinson* disease OR (MH "Parkinsonian Disorders+")                                                                                                                  | 34,733              |
| 6   | (MH "Alzheimer's Disease+") or alzheimer* disease OR dementia                                                                                                                                      | 108,442             |
| 7   | culinary                                                                                                                                                                                           | 4,838               |
| 8   | (MH "Cooking+") OR cook*                                                                                                                                                                           | 498                 |
| 9   | (MH "Meals+") OR meal*                                                                                                                                                                             | 40                  |

|    |                                                                                                                                      |           |
|----|--------------------------------------------------------------------------------------------------------------------------------------|-----------|
| 10 | (MH "Food+") OR food                                                                                                                 | 317       |
| 11 | (MH "Nutrition+") OR (MH "Nutrition Services+") OR<br>nutrition OR (MH "diet+") OR diet* OR "diet* change"<br>OR "behavio?r* change" | 2         |
| 12 | program                                                                                                                              | 584,926   |
| 13 | (MH "Education") or education                                                                                                        | 1,593     |
| 14 | (MH "Diet Therapy+" OR diet* therap* OR nutrition<br>therap*                                                                         | 21        |
| 15 | intervention OR "skill* buil*" OR (MH "motor skills+")<br>OR (MH"skill acquisition+")                                                | 573,584   |
| 16 | train* OR (MH "Cognitive Therapy+") OR (MH<br>"Cognitive Rehabilitation+")                                                           | 342,541   |
| 17 | (MH "Rehabilitation+") or rehabilitation                                                                                             | 530       |
| 18 | (MH "Health Education+") OR health education                                                                                         | 196,251   |
| 19 | (MH "Patient Education+") OR patient education                                                                                       | 104,691   |
| 20 | (MH "Health Promotion+") OR health promotion                                                                                         | 93,346    |
| 21 | S1 OR S2 OR S3 OR S4 OR S5 OR S6                                                                                                     | 943,111   |
| 22 | S7 OR S8 OR S9 OR S10 OR S11                                                                                                         | 5,144     |
| 23 | S12 OR S13 OR S14 OR S15 OR S16 OR S17 OR S18<br>OR S19 OR S20                                                                       | 1,423,168 |
| 24 | S21 AND S22 AND S23                                                                                                                  | 43        |

| No. | Search Terms (Embase)                                                             | Results (n = 5,546) |
|-----|-----------------------------------------------------------------------------------|---------------------|
| 1   | neurological disease/ or neurological condition.mp.                               | 177,827             |
| 2   | stroke.mp. or cerebrovascular accident/                                           | 644,168             |
| 3   | brain injury/ or brain injur*.mp. or traumatic brain<br>injury/                   | 196,183             |
| 4   | multiple sclerosis.mp. or multiple sclerosis/                                     | 178,934             |
| 5   | Parkinson disease/ or Parkinson* disease.mp.                                      | 223,538             |
| 6   | Alzheimer disease/ or alzheimer* disease.mp.                                      | 293,932             |
| 7   | culinary.mp.                                                                      | 3,416               |
| 8   | cook*.ti,ab. or cooking/                                                          | 54,455              |
| 9   | Meals/ or meal.ti,ab.                                                             | 125,731             |
| 10  | Food/ or food.ti,ab.                                                              | 700,954             |
| 11  | nutrition/ or nutrition.mp.                                                       | 329,723             |
| 12  | health program/ or education program/ or program.ti,ab.<br>or nutrition services/ | 869,594             |
| 13  | Education/ or education.ti,ab.                                                    | 1,016,332           |
| 14  | Diet Therapy/ or diet* therap*.ti,ab.                                             | 71,090              |
| 15  | intervention.ti,ab.                                                               | 1,170,268           |
| 16  | train*.ti,ab.                                                                     | 974,082             |
| 17  | Rehabilitation/ or rehabilitation.ti,ab.                                          | 320,302             |

|    |                                  |           |
|----|----------------------------------|-----------|
| 18 | 1 or 2 or 3 or 4 or 5 or 6       | 1,570,292 |
| 19 | 7 or 8 or 9 or 10 or 11          | 1,090,158 |
| 20 | 12 or 13 or 14 or 15 or 16 or 17 | 3,625,294 |
| 21 | 18 and 19 and 20                 | 5,546     |

| Search Terms (Scopus)                                                                                                                                                                                                                                                                                                                                                                        | Results (n = 3,745) |
|----------------------------------------------------------------------------------------------------------------------------------------------------------------------------------------------------------------------------------------------------------------------------------------------------------------------------------------------------------------------------------------------|---------------------|
| TITLE-ABS-KEY ( "Neurological Condition" OR "Nervous System Disease" OR stroke OR "Brain Injur*" OR "Multiple Sclerosis" OR "Parkinson* Disease" OR "Alzheimer* Disease" ) AND TITLE-ABS ( culinary OR cook* OR meal* OR food OR nutrition ) AND TITLE-ABS ( program OR education OR "Diet* Therap*" OR intervention OR train* OR rehabilitation ) AND ( LIMIT-TO ( LANGUAGE , "English" ) ) | 3,745               |

| Search Terms (Proquest)                                                                                                                                                                                                                                                                                                                  | Results (n = 1,213) |
|------------------------------------------------------------------------------------------------------------------------------------------------------------------------------------------------------------------------------------------------------------------------------------------------------------------------------------------|---------------------|
| Exact("alzheimer disease" OR "brain injury" OR "brain injuries" OR "multiple sclerosis" OR "parkinson disease" OR "stroke" OR "neurological conditions") AND ((Culinary OR Cook* OR Exact("meals") OR Food OR Nutrition) AND (Program OR Education OR Intervention OR Rehabilitation OR Exact("Nutrition Education" OR "Diet Therapy"))) | 1,213               |

Limit Source Type (Scholarly Journal), Document Type (Evidence Based Healthcare), Language (English)
